# Supplementary material for: A 14.5-million-year record of East Antarctic Ice Sheet fluctuations from the central Transantarctic Mountains, constrained with cosmogenic 3 He, 10 Be, 21 Ne, and 26 Al
Source: Copernicus journal article supplement (doi:10.5194/tc-14-2647-2020), 2020-08-20
Supplement: Supplementary file 1 [file tc-14-2647-2020-supplement.zip]

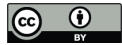

## *Supplement of*

# **A 14.5-million-year record of East Antarctic Ice Sheet fluctuations from the central Transantarctic Mountains, constrained with cosmogenic $^3\text{He}$ , $^{10}\text{Be}$ , $^{21}\text{Ne}$ , and $^{26}\text{Al}$**

**Allie Balter-Kennedy et al.**

*Correspondence to:* Allie Balter-Kennedy (abalter@ldeo.columbia.edu)

- tc-14-2647-2020-supplement-title-page.pdf
- Balter – Supplementary Tables – Roberts Paper
  - .DS\_Store
  - Balter\_RobertsMassif\_TableS1\_11Feb20.xlsx
  - Balter\_RobertsMassif\_TableS2\_11Feb20.xlsx
  - Balter\_RobertsMassif\_TableS3\_11Feb20.xlsx
  - Balter\_RobertsMassif\_TableS4\_11Feb20.xlsx
  - Balter\_RobertsMassif\_TableS5\_11Feb20.xlsx

The copyright of individual parts of the supplement might differ from the CC BY 4.0 License.
